# Supplementary material
Source: PubMed Central journal article supplement (PMC7573242)
Supplement: TBSD_A_1815584_SM9091.pdf [file TBSD_A_1815584_SM9091.pdf]

# Molecular docking, validation, dynamics simulations, and pharmacokinetic prediction of natural compounds against SARS-CoV-2 Main-Protease

<sup>1</sup>SHIVANIKA M, <sup>2</sup>DEEPAK KUMAR S, <sup>3</sup>VENKATARAGHAVAN R, <sup>4</sup>PAWAN TIWARI, <sup>5</sup>BRINDHA DEVI P\*, <sup>6</sup>SUMITHA A

<sup>1,5</sup>Department of Bio-Engineering, School of Engineering, Vels Institute of Science, Technology and Advanced Studies, Pallavaram, Chennai-600117

<sup>2</sup>Department of Biotechnology, Rajalakshmi Engineering College, Thandalam, Tamil Nadu 602105

<sup>3</sup>Department of Chemical Engineering, Alagappa College of Technology, Anna University, Chennai-600025

<sup>4</sup>Department of Pharmaceutical Science, Kumaun University, Bhimtal campus, Uttarakhand, India

<sup>6</sup>Department of Pharmacology, ACS Medical College and Hospital, Chennai-600077

\*Corresponding author email: [hodb.techbiotech@velsuniv.ac.in](mailto:hodb.techbiotech@velsuniv.ac.in)

Table S1: Binding scores and Ki values of natural ligands

| S. No | Ligand                    | Binding score (kcal/mol) | Ki value  |
|-------|---------------------------|--------------------------|-----------|
| 1.    | Theaflavin-3-3'-digallate | -12.41                   | 794.96 pM |
| 2.    | Rutin                     | -11.33                   | 4.98 nM   |
| 3.    | Hypericin                 | -11.17                   | 6.54 nM   |
| 4.    | Robustaflavone            | -10.92                   | 9.85 nM   |
| 5.    | Solenolide A              | -10.81                   | 11.88 nM  |
| 6.    | Rhusflavone               | -10.77                   | 12.75 nM  |
| 7.    | Ginkgetin                 | -10.47                   | 20.98 nM  |
| 8.    | Rhinacanthin E            | -10.43                   | 22.73 nM  |
| 9.    | Sorbarin                  | -10.02                   | 45.41 nM  |
| 10.   | Betulinic acid            | -9.99                    | 47.91 nM  |
| 11.   | Vaticinone                | -9.91                    | 54.24 nM  |
| 12.   | Clemastanin B             | -9.89                    | 55.90 nM  |
| 13.   | Vitexin                   | -9.86                    | 59.46 nM  |
| 14.   | Theaflavin                | -9.81                    | 64.76 nM  |
| 15.   | Prunin                    | -9.74                    | 72.15 nM  |
| 16.   | Lucialdehyde D            | -9.63                    | 87.64 nM  |
| 17.   | Taiwanschirin D           | -9.58                    | 94.48 nM  |
| 18.   | Scytovirin                | -9.33                    | 146.00 nM |
| 19.   | Scutellarin               | -9.29                    | 154.15 nM |
| 20.   | Alpha-amyrin              | -9.29                    | 154.58 nM |
| 21.   | Hypocrellin A             | -9.28                    | 157.01 nM |
| 22.   | Sitosterol                | -9.26                    | 163.72 nM |
| 23.   | Agathisflavone            | -9.25                    | 167.13 nM |
| 24.   | Genkanolb                 | -9.24                    | 168.81 nM |
| 25.   | Violathin                 | -9.23                    | 171.23 nM |
| 26.   | Biflavone                 | -9.20                    | 179.35 nM |
| 27.   | Glycyrrhetic acid         | -9.19                    | 182.97 nM |
| 28.   | Garciosaterpene A         | -9.19                    | 183.31 nM |
| 29.   | CVL                       | -9.17                    | 188.51 nM |
| 30.   | Silibinin                 | -9.11                    | 210.49 nM |
| 31.   | Epitarascerol             | -9.11                    | 210.67 nM |

|     |                          |       |              |
|-----|--------------------------|-------|--------------|
| 32. | Uvaol                    | -9.10 | 214.62 nM    |
| 33. | Proanthocyanidins        | -9.03 | 238.80 nM    |
| 34. | Swertisin                | -8.96 | 272.74 nM    |
| 35. | Cercosporin              | -8.89 | 302.47 nM    |
| 36. | Rhoifolin                | -8.89 | 302.78 nM    |
| 37. | Mangiferin               | -8.89 | 306.46 nM    |
| 38. | Schizarin B              | -8.88 | 309.77 nM    |
| 39. | Moronic acid             | -8.85 | 324.55 nM    |
| 40. | Rhinacanthin F           | -8.84 | 331.91 nM    |
| 41. | Garciosaterpene C        | -8.80 | 355.43 nM    |
| 42. | Honokiol                 | -8.75 | 385.20 nM    |
| 43. | Oroxindin                | -8.75 | 388.01 nM    |
| 44. | Yatein                   | -8.71 | 414.52 nM    |
| 45. | Maslinic acid            | -8.68 | 435.99 nM    |
| 46. | Ursolic acid             | -8.65 | 459.59 nM    |
| 47. | Genkwanolc               | -8.61 | 489.62 nM    |
| 48. | Kaempferol               | -8.59 | 508.35 nM    |
| 49. | Xanthohumol              | -8.58 | 514.85 nM    |
| 50. | Dihydroquercetin         | -8.57 | 525.45 nM    |
| 51. | Polydatin                | -8.56 | 531.85 nM    |
| 52. | Sophoricoside            | -8.45 | 644.68 nM    |
| 53. | Hinokinin                | -8.41 | 680.02 nM    |
| 54. | TMP                      | -8.37 | 735.56 nM    |
| 55. | Sesamin                  | -8.36 | 742.01 nM    |
| 56. | Morin                    | -8.33 | 778.53 nM    |
| 57. | Spongiadiol              | -8.28 | 850.58 nM    |
| 58. | Myricitrin               | -8.25 | 898.88 nM    |
| 59. | Glabranine               | -8.24 | 909.83 nM    |
| 60. | Agastaquinone            | -8.23 | 928.61 nM    |
| 61. | Phleichrome              | -8.17 | 1.03 $\mu$ M |
| 62. | Guineesin                | -8.14 | 1.09 $\mu$ M |
| 63. | Tetrahydroxyflavone      | -8.03 | 1.30 $\mu$ M |
| 64. | Diphyllin                | -8.02 | 1.33 $\mu$ M |
| 65. | Rubrifloralignan A       | -8.01 | 1.35 $\mu$ M |
| 66. | Oxyayanin A              | -7.93 | 1.54 $\mu$ M |
| 67. | Epicatechin gallate      | -7.93 | 1.55 $\mu$ M |
| 68. | Cosmosiin                | -7.92 | 1.57 $\mu$ M |
| 69. | Chrysosplenol E          | -7.90 | 1.61 $\mu$ M |
| 70. | Acacetin                 | -7.90 | 1.63 $\mu$ M |
| 71. | Chrysin                  | -7.87 | 1.70 $\mu$ M |
| 72. | Phillygenin              | -7.86 | 1.72 $\mu$ M |
| 73. | Tectochrysin             | -7.84 | 1.79 $\mu$ M |
| 74. | Uncinosideb              | -7.83 | 1.81 $\mu$ M |
| 75. | Scutellarein             | -7.83 | 1.82 $\mu$ M |
| 76. | Dolabelladienetriol      | -7.82 | 1.85 $\mu$ M |
| 77. | Epigallocatechin gallate | -7.80 | 1.92 $\mu$ M |
| 78. | UDA 680                  | -7.77 | 2.02 $\mu$ M |
| 79. | Chrysoeriol              | -7.73 | 2.17 $\mu$ M |

|      |                                     |       |              |
|------|-------------------------------------|-------|--------------|
| 80.  | Galangin                            | -7.72 | 2.19 $\mu$ M |
| 81.  | Cirsimaritin                        | -7.69 | 2.31 $\mu$ M |
| 82.  | NDGA                                | -7.69 | 2.31 $\mu$ M |
| 83.  | Liquiritin                          | -7.68 | 2.34 $\mu$ M |
| 84.  | Naringin                            | -7.67 | 2.39 $\mu$ M |
| 85.  | Coumarin                            | -7.63 | 2.54 $\mu$ M |
| 86.  | Avarone                             | -7.61 | 2.66 $\mu$ M |
| 87.  | Apigenin                            | -7.60 | 2.67 $\mu$ M |
| 88.  | Pectolarigenin                      | -7.60 | 2.68 $\mu$ M |
| 89.  | Axillarin                           | -7.60 | 2.69 $\mu$ M |
| 90.  | Neotripterifordin                   | -7.59 | 2.75 $\mu$ M |
| 91.  | Hesperidin                          | -7.58 | 2.79 $\mu$ M |
| 92.  | Resveratrol                         | -7.57 | 2.81 $\mu$ M |
| 93.  | Chrysosplenol C                     | -7.56 | 2.90 $\mu$ M |
| 94.  | Wogonin                             | -7.54 | 2.99 $\mu$ M |
| 95.  | Pectolarin                          | -7.53 | 3.01 $\mu$ M |
| 96.  | Lycolene                            | -7.51 | 3.12 $\mu$ M |
| 97.  | Luteolin                            | -7.49 | 3.25 $\mu$ M |
| 98.  | Curcumin                            | -7.48 | 3.27 $\mu$ M |
| 99.  | Dehydroandrographolide              | -7.47 | 3.32 $\mu$ M |
| 100. | Chrysosplenol B                     | -7.42 | 3.66 $\mu$ M |
| 101. | Myricetin                           | -7.39 | 3.82 $\mu$ M |
| 102. | Piperlonguminine                    | -7.37 | 3.97 $\mu$ M |
| 103. | Embinin                             | -7.35 | 4.07 $\mu$ M |
| 104. | Equol                               | -7.35 | 4.10 $\mu$ M |
| 105. | Chrysosplenoside B                  | -7.33 | 4.21 $\mu$ M |
| 106. | Limaquinone                         | -7.33 | 4.27 $\mu$ M |
| 107. | 2,5-Bis(2-thienylethynyl) thiophene | -7.30 | 4.49 $\mu$ M |
| 108. | Vasicoline                          | -7.28 | 4.60 $\mu$ M |
| 109. | Epigallocatechin                    | -7.28 | 4.63 $\mu$ M |
| 110. | Avarol                              | -7.27 | 4.66 $\mu$ M |
| 111. | Cirsimaritin                        | -7.27 | 4.70 $\mu$ M |
| 112. | Quercetagenin                       | -7.26 | 4.74 $\mu$ M |
| 113. | Artemisin                           | -7.26 | 4.78 $\mu$ M |
| 114. | Baicalin                            | -7.21 | 5.17 $\mu$ M |
| 115. | 6-Shogaol                           | -7.21 | 5.18 $\mu$ M |
| 116. | Genistein                           | -7.21 | 5.20 $\mu$ M |
| 117. | 5,6,7- trimethoxyflavone            | -7.20 | 5.23 $\mu$ M |
| 118. | Diosmetin                           | -7.19 | 5.35 $\mu$ M |
| 119. | Orientin                            | -7.17 | 5.55 $\mu$ M |
| 120. | Aesculin                            | -7.15 | 5.73 $\mu$ M |
| 121. | Chrysosplenoside A                  | -7.13 | 5.96 $\mu$ M |
| 122. | Iridins                             | -7.12 | 6.08 $\mu$ M |
| 123. | Baicalein                           | -7.11 | 6.15 $\mu$ M |
| 124. | Chrysosplenol D                     | -7.06 | 6.66 $\mu$ M |
| 125. | Bicyclol                            | -6.99 | 7.57 $\mu$ M |
| 126. | ACBP-thiophene                      | -6.97 | 7.74 $\mu$ M |
| 127. | Amentoflavone                       | -6.89 | 8.88 $\mu$ M |

|      |                                  |       |                      |
|------|----------------------------------|-------|----------------------|
| 128. | Apiin                            | -6.89 | 8.92 $\mu\text{M}$   |
| 129. | A-terthienyl                     | -6.81 | 10.13 $\mu\text{M}$  |
| 130. | Paradol                          | -6.80 | 10.34 $\mu\text{M}$  |
| 131. | Hyperin                          | -6.77 | 10.90 $\mu\text{M}$  |
| 132. | Emodin                           | -6.66 | 13.17 $\mu\text{M}$  |
| 133. | Cona                             | -6.63 | 13.82 $\mu\text{M}$  |
| 134. | SCL                              | -6.60 | 14.61 $\mu\text{M}$  |
| 135. | Glucuronide                      | -6.58 | 15.05 $\mu\text{M}$  |
| 136. | Aloe emodin                      | -6.57 | 15.21 $\mu\text{M}$  |
| 137. | Visnagin                         | -6.50 | 17.31 $\mu\text{M}$  |
| 138. | Harmalol                         | -6.49 | 17.56 $\mu\text{M}$  |
| 139. | Anthraquinone chrysophanic acid  | -6.47 | 18.11 $\mu\text{M}$  |
| 140. | Isorhamnetin                     | -6.46 | 18.34 $\mu\text{M}$  |
| 141. | Harmaline                        | -6.45 | 18.85 $\mu\text{M}$  |
| 142. | Harmine                          | -6.44 | 19.17 $\mu\text{M}$  |
| 143. | Chrysosplenoside D               | -6.43 | 19.32 $\mu\text{M}$  |
| 144. | Vasicinone                       | -6.43 | 19.38 $\mu\text{M}$  |
| 145. | Chitosan oligosaccharide lactate | -6.38 | 21.04 $\mu\text{M}$  |
| 146. | Geniposide                       | -6.36 | 21.81 $\mu\text{M}$  |
| 147. | B-Caryophyllene                  | -6.34 | 22.44 $\mu\text{M}$  |
| 148. | Harmol                           | -6.34 | 22.42 $\mu\text{M}$  |
| 149. | B-Caryophyllene oxide            | -6.29 | 24.70 $\mu\text{M}$  |
| 150. | Khellin                          | -6.19 | 28.85 $\mu\text{M}$  |
| 151. | 3-hydroxy caruilignan            | -6.12 | 32.74 $\mu\text{M}$  |
| 152. | Farnesol                         | -6.06 | 36.36 $\mu\text{M}$  |
| 153. | Niranthin                        | -5.95 | 43.38 $\mu\text{M}$  |
| 154. | Harmane                          | -5.94 | 44.48 $\mu\text{M}$  |
| 155. | 1,8-cineole                      | -5.93 | 44.95 $\mu\text{M}$  |
| 156. | Sandalwood oil                   | -5.91 | 46.88 $\mu\text{M}$  |
| 157. | 8-gingerol                       | -5.90 | 47.10 $\mu\text{M}$  |
| 158. | 8-methoxypsoralen                | -5.89 | 47.83 $\mu\text{M}$  |
| 159. | Aesculetin                       | -5.85 | 81.87 $\mu\text{M}$  |
| 160. | Terpinen-4-ol                    | -5.82 | 54.62 $\mu\text{M}$  |
| 161. | 10-gingerol                      | -5.76 | 60.34 $\mu\text{M}$  |
| 162. | $\alpha$ -Pinene                 | -5.75 | 60.93 $\mu\text{M}$  |
| 163. | Vasicol                          | -5.75 | 60.99 $\mu\text{M}$  |
| 164. | Angelicin                        | -5.73 | 63.33 $\mu\text{M}$  |
| 165. | Dictamnine                       | -5.72 | 64.23 $\mu\text{M}$  |
| 166. | Phenylheptatriyne                | -5.63 | 74.43 $\mu\text{M}$  |
| 167. | NPL                              | -5.63 | 75.15 $\mu\text{M}$  |
| 168. | Deoxyvasicinone                  | -5.62 | 77.06 $\mu\text{M}$  |
| 169. | Borneol                          | -5.57 | 82.69 $\mu\text{M}$  |
| 170. | Chlorogenic acid                 | -5.53 | 87.75 $\mu\text{M}$  |
| 171. | Zingerone                        | -5.50 | 93.55 $\mu\text{M}$  |
| 172. | Vasicine                         | -5.48 | 96.83 $\mu\text{M}$  |
| 173. | A-Terpineol                      | -5.45 | 100.43 $\mu\text{M}$ |
| 174. | Carvone                          | -5.44 | 102.58 $\mu\text{M}$ |
| 175. | Deoxyvasicine                    | -5.42 | 106.38 $\mu\text{M}$ |

|      |                            |       |                      |
|------|----------------------------|-------|----------------------|
| 176. | Perillic acid              | -5.25 | 141.19 $\mu\text{M}$ |
| 177. | Thymoquinone               | -5.25 | 142.07 $\mu\text{M}$ |
| 178. | A-Terpinene                | -5.23 | 147.63 $\mu\text{M}$ |
| 179. | Limonene                   | -5.22 | 149.29 $\mu\text{M}$ |
| 180. | Myristicin                 | -5.20 | 155.30 $\mu\text{M}$ |
| 181. | Salvianic acid A           | -5.19 | 157.53 $\mu\text{M}$ |
| 182. | Eugenol                    | -4.99 | 220.17 $\mu\text{M}$ |
| 183. | Hydroxyanthanilic acid     | -4.95 | 236.52 $\mu\text{M}$ |
| 184. | Thymol                     | -4.93 | 244.27 $\mu\text{M}$ |
| 185. | Arecoline hydrochloride    | -4.90 | 256.46 $\mu\text{M}$ |
| 186. | Thiarubrine-A              | -4.90 | 257.03 $\mu\text{M}$ |
| 187. | Anise oil                  | -4.89 | 262.29 $\mu\text{M}$ |
| 188. | Citral                     | -4.88 | 263.24 $\mu\text{M}$ |
| 189. | P-Cymene                   | -4.86 | 274.44 $\mu\text{M}$ |
| 190. | Trans-Anethole             | -4.85 | 278.08 $\mu\text{M}$ |
| 191. | Caffeic acid               | -4.83 | 286.94 $\mu\text{M}$ |
| 192. | Beta-myrcene               | -4.68 | 371.35 $\mu\text{M}$ |
| 193. | Thiophene-A                | -4.63 | 406.86 $\mu\text{M}$ |
| 194. | Ligustrazine hydrochloride | -4.60 | 423.11 $\mu\text{M}$ |
| 195. | GNA                        | -4.36 | 634.30 $\mu\text{M}$ |
| 196. | Gallic acid                | -4.36 | 640.06 $\mu\text{M}$ |
| 197. | MVL                        | -4.36 | 641.49 $\mu\text{M}$ |
| 198. | Thyme oil                  | -4.28 | 725.43 $\mu\text{M}$ |
| 199. | OAA                        | -3.94 | 1.28 mM              |
| 200. | Tea tree oil               | -1.98 | 35.31 mM             |

---
